# Supplementary material for: Proximate Composition, Antioxidant Properties, and Hepatoprotective Activity of Three Species of Shellfish of the Pacific Coast of Russia
Source: MDPI journal article supplement (doi:10.3390/molecules26113397), 2021-06-03
Supplement: s1 [file s1]

## Supporting Materials

# Proximate Composition, Antioxidant Properties, and Hepatoprotective Activity of Three Species of Shellfish of the Pacific Coast of Russia

Ekaterina P. Karaulova \*, Evgeny V. Yakush, Tatiana N. Slutskaya and Lidiya V. Shulgina

Russian Federal Research Institute of Fisheries and Oceanography, Pacific Branch (TINRO), 4, Shevchenko Alley, 690091 Vladivostok, Russia

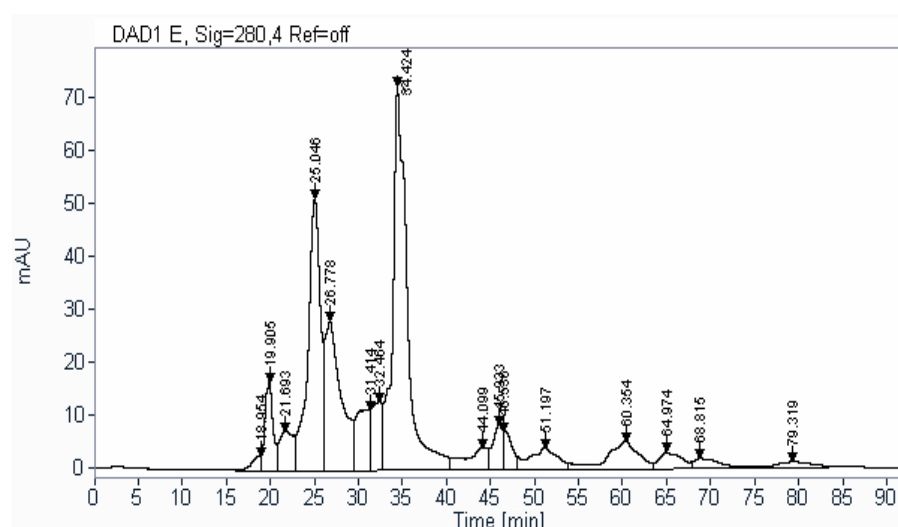

**Figure S1.** HPLC and molecular weight distribution of water-soluble proteins of *Anadara broughtonii* tissue (cold water extraction).

**Table S1.** Molecular weight distribution of water-soluble proteins of *Anadara broughtonii* tissue (cold water extraction).

| No | RT [min] | Area% | RT ml | MW, Da |
|----|----------|-------|-------|--------|
| 1  | 18,95    | 0,82  | 5,69  | >30000 |
| 2  | 19,91    | 3,97  | 5,97  |        |
| 3  | 21,69    | 3,19  | 6,51  |        |
| 4  | 25,05    | 18,75 | 7,52  | >10000 |
| 5  | 26,78    | 13,45 | 8,03  |        |
| 6  | 31,41    | 4,71  | 9,42  |        |
| 7  | 32,46    | 3,86  | 9,74  | 6800   |
| 8  | 34,42    | 31,08 | 10,33 | 6400   |
| 9  | 44,1     | 2,8   | 13,23 | 3900   |
| 10 | 45,93    | 2,51  | 13,78 | 3500   |
| 11 | 46,54    | 1,7   | 13,96 | 3300   |
| 12 | 51,2     | 3,32  | 15,36 | 2100   |
| 13 | 60,35    | 4,86  | 18,11 | <1000  |
| 14 | 64,97    | 2,1   | 19,49 |        |
| 15 | 68,82    | 1,58  | 20,65 |        |
| 16 | 79,32    | 1,31  | 23,80 |        |

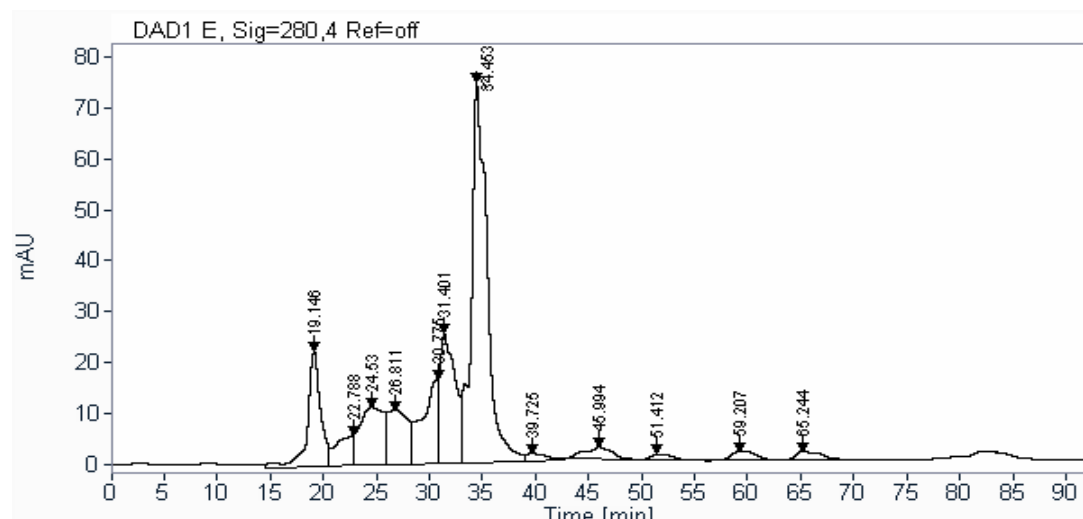

**Figure S2.** HPLC and molecular weight distribution of water-soluble proteins of *Anadara broughtonii* tissue (hot water extraction).

**Table S2.** Molecular weight distribution of water-soluble proteins of *Anadara broughtonii* tissue (hot water extraction).

| №  | RT [min] | Area% | RT ml | MW, Da |
|----|----------|-------|-------|--------|
| 1  | 19,15    | 10,23 | 5,75  | >30000 |
| 2  | 22,79    | 3,36  | 6,84  |        |
| 3  | 24,53    | 9,44  | 7,36  |        |
| 4  | 26,81    | 7,38  | 8,04  | >10000 |
| 5  | 30,77    | 8,73  | 9,23  | 7300   |
| 6  | 31,4     | 13,71 | 9,42  | 7100   |
| 7  | 34,45    | 40,43 | 10,34 | 6400   |
| 8  | 39,72    | 1,01  | 11,92 | 5000   |
| 9  | 45,99    | 2,12  | 13,80 | 3500   |
| 10 | 51,41    | 0,8   | 15,42 | 2100   |
| 11 | 59,21    | 1,42  | 17,76 | <1000  |
| 12 | 65,24    | 1,36  | 19,57 |        |

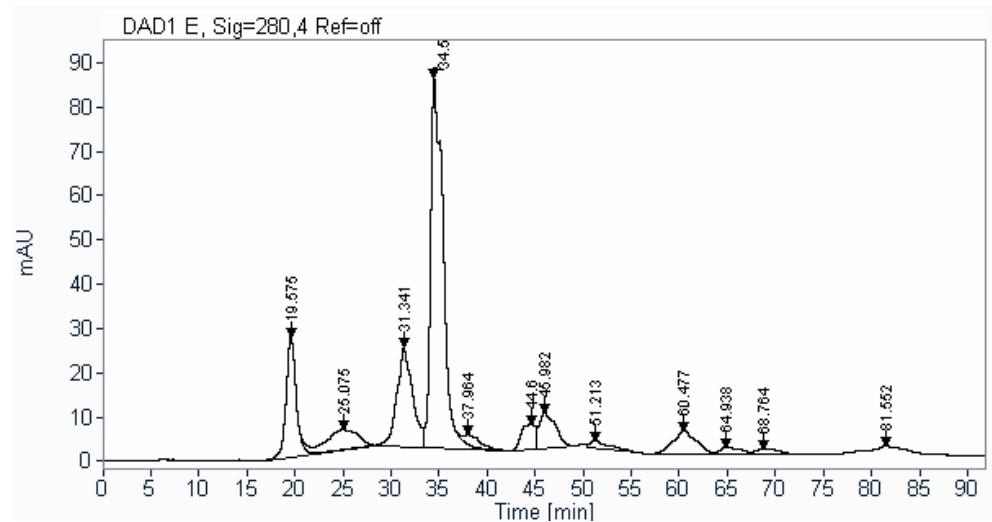

**Figure S3.** HPLC and molecular weight distribution of water-soluble proteins of *Spisula sachalinensis* tissue (cold water extraction).

**Table S3.** Molecular weight distribution of water-soluble proteins of *Spisula sachalinensis* tissue (cold water extraction).

| №  | RT [min] | Area% | RT ml | MW, Da |
|----|----------|-------|-------|--------|
| 1  | 19,58    | 11,36 | 5,87  | >30000 |
| 2  | 25,08    | 6,38  | 7,52  | >10000 |
| 3  | 31,34    | 14,49 | 9,40  | 7500   |
| 4  | 34,5     | 44,19 | 10,35 | 6400   |
| 5  | 37,97    | 1,76  | 11,39 | 5500   |
| 6  | 44,6     | 3,26  | 13,38 | 3800   |
| 7  | 45,98    | 5,37  | 13,79 | 3500   |
| 8  | 51,21    | 1,42  | 15,36 | 2200   |
| 9  | 60,48    | 5,03  | 18,14 | <1000  |
| 10 | 64,94    | 1,37  | 19,48 |        |
| 11 | 68,76    | 1,29  | 20,63 |        |
| 12 | 81,55    | 4,08  | 24,47 |        |

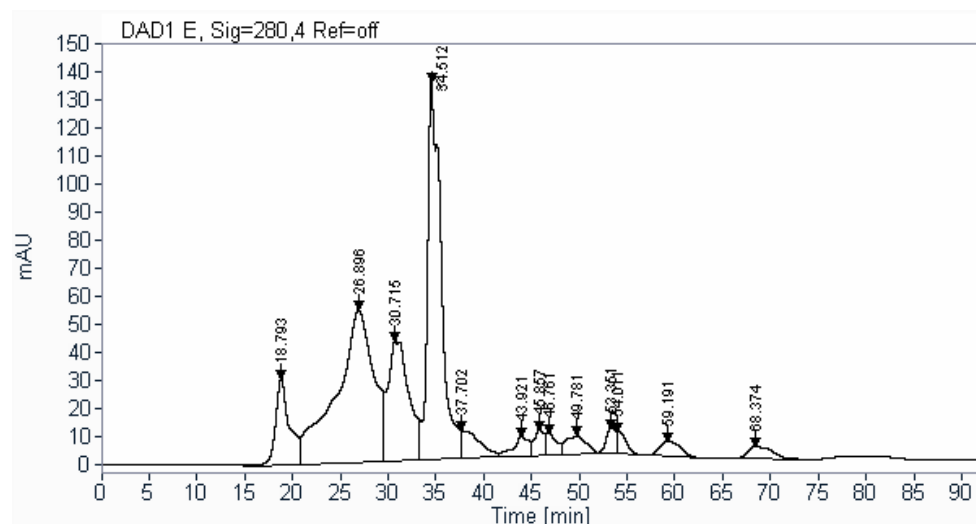

**Figure S4.** HPLC and molecular weight distribution of water-soluble proteins of *Spisula sachalinensis* tissue (hot water extraction).

**Table S4.** Molecular weight distribution of water-soluble proteins of *Spisula sachalinensis* tissue (hot water extraction).

| №  | RT [min] | Area% | RT ml | MW, Da |
|----|----------|-------|-------|--------|
| 1  | 18,79    | 6,94  | 5,64  | >30000 |
| 2  | 26,9     | 32,74 | 8,07  | >10000 |
| 3  | 30,71    | 15,82 | 9,21  | 7300   |
| 4  | 34,51    | 31,9  | 10,35 | 6400   |
| 5  | 37,7     | 4,92  | 11,31 | 5600   |
| 6  | 43,92    | 0,56  | 13,18 | 4000   |
| 7  | 45,86    | 0,78  | 13,76 | 3500   |
| 8  | 46,71    | 0,74  | 14,01 | 3300   |
| 9  | 49,78    | 0,65  | 14,93 | 2500   |
| 10 | 53,35    | 0,8   | 16,01 | 1600   |
| 11 | 54,01    | 0,87  | 16,20 | 1500   |
| 12 | 59,19    | 1,8   | 17,76 | <1000  |
|    | 68,37    | 1,63  | 20,51 |        |

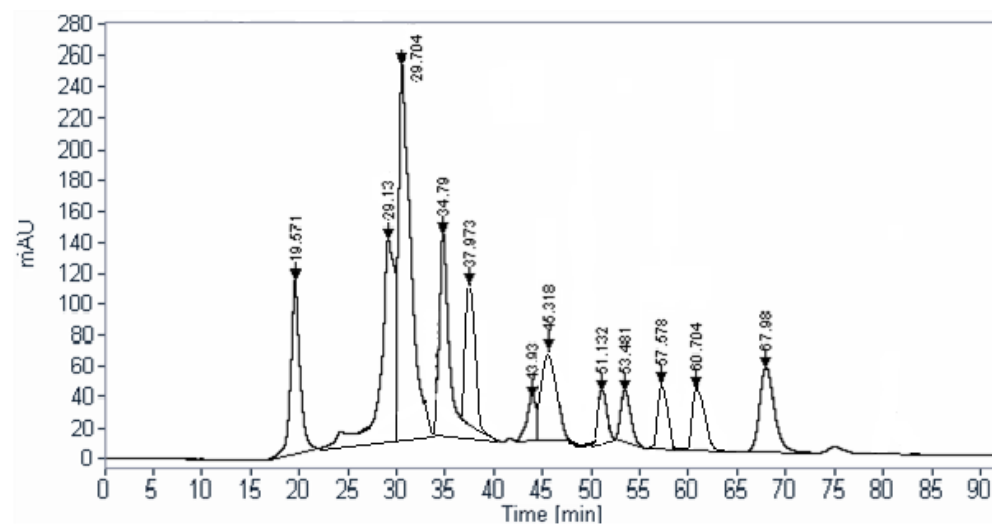

**Figure S5.** HPLC and molecular weight distribution of water-soluble proteins of *Corbicula japonica* tissue (cold water extraction).

**Table S5.** Molecular weight distribution of water-soluble proteins of *Corbicula japonica* tissue (cold water extraction).

| RT ml  | RT [min] | Area, % | MW     |
|--------|----------|---------|--------|
| 5,868  | 19,56    | 7,9     | >30000 |
| 8,739  | 29,13    | 9,76    |        |
| 8,9112 | 29,704   | 18,92   |        |
| 10,437 | 34,79    | 14,71   | 6300   |
| 11,391 | 37,97    | 12,36   | 5500   |
| 13,179 | 43,93    | 1,94    | 4000   |
| 13,596 | 45,32    | 9,62    | 3700   |
| 15,339 | 51,13    | 3,53    | 2200   |
| 16,044 | 53,48    | 3,49    | 1600   |
| 17,274 | 57,58    | 3,79    | <1000  |
| 18,213 | 60,71    | 3,91    |        |
| 20,394 | 67,98    | 9,97    |        |

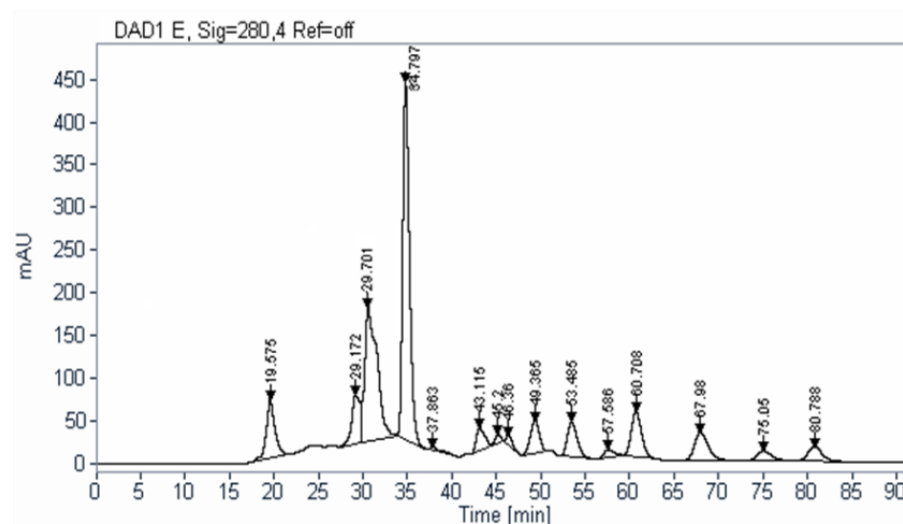

**Figure S6.** HPLC and molecular weight distribution of water-soluble proteins of *Corbicula japonica* tissue (hot water extraction).

**Table S6.** Molecular weight distribution of water-soluble proteins of *Corbicula japonica* tissue (hot water extraction).

| RT min | Area, % | RT ml | MW     |
|--------|---------|-------|--------|
| 19,56  | 6,81    | 5,87  | >30000 |
| 29,17  | 5,24    | 8,75  |        |
| 29,701 | 23,18   | 8,91  |        |
| 34,8   | 34,98   | 10,44 | 6300   |
| 37,86  | 0,93    | 11,36 | 5500   |
| 43,11  | 2,31    | 12,93 | 4200   |
| 45,2   | 0,63    | 13,56 | 3700   |
| 46,36  | 0,64    | 13,91 | 3400   |
| 49,36  | 3,8     | 14,81 | 2600   |
| 53,49  | 4,2     | 16,05 | 1600   |
| 57,59  | 1,01    | 17,28 | <1000  |
| 60,71  | 6,32    | 18,21 |        |
| 67,98  | 5,1     | 20,39 |        |
| 75,05  | 2,04    | 22,52 |        |
| 80,79  | 2,71    | 24,24 |        |
